# Supplementary material for: Determining Individual Variation in Growth and Its Implication for Life-History and Population Processes Using the Empirical Bayes Method
Source: PLOS journal article supplement (doi:10.1371/journal.pcbi.1003828), 2014-09-11
Supplement: S2 (10.1371/journal.pcbi.1003828.s002) [file journal.pcbi.1003828.s002]

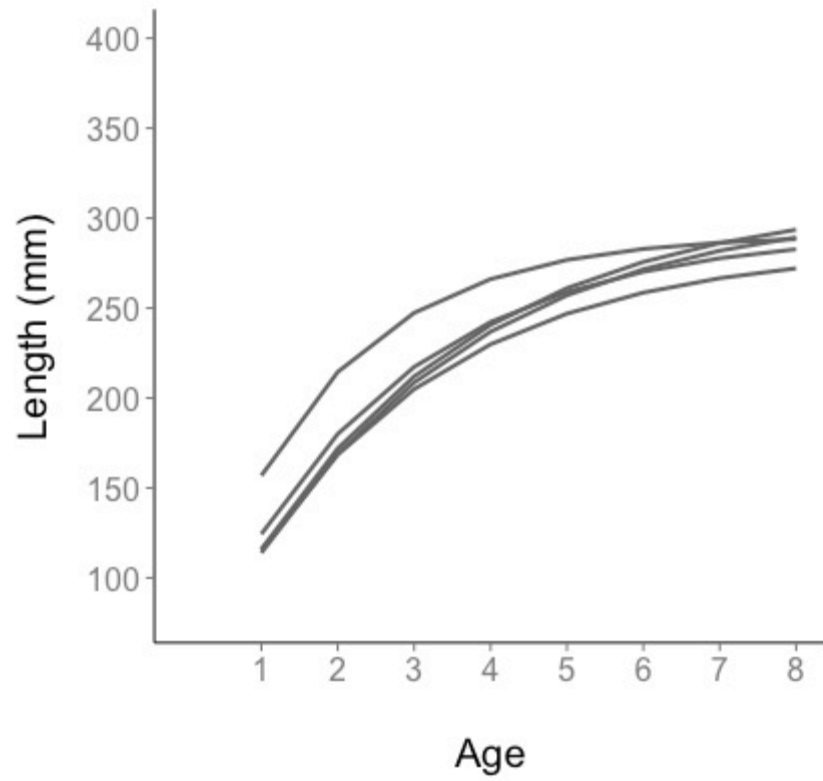

**Figure S2.** Cohort-specific growth trajectories for the marble trout populations of Zakojska for cohorts up to 2002 included.
