# Supplementary material for: Determining Individual Variation in Growth and Its Implication for Life-History and Population Processes Using the Empirical Bayes Method
Source: PLOS journal article supplement (doi:10.1371/journal.pcbi.1003828), 2014-09-11
Supplement: S3 (10.1371/journal.pcbi.1003828.s003) [file journal.pcbi.1003828.s003]

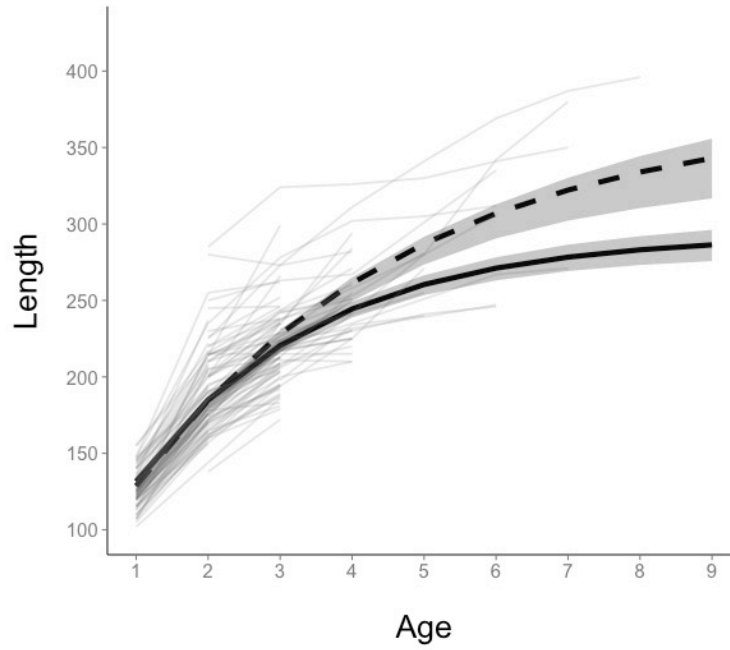

**Figure S3.** Confidence bands for mean cohort-specific growth trajectory (i.e. random effects  $u$  and  $v = 0$ ) using the von Bertalanffy growth function model with cohort as a categorical predictor for both  $L_{\infty}$  and  $k$  (solid line) and non-linear least-squares regression using the R function *nls* (dashed line) for the 1999 cohort of the Zakojska population (*nls* vBGF, mean and 95% confidence interval:  $L_{\infty} = 373.55$  mm [335.65-434.51],  $k = 0.26 \text{ y}^{-1}$  [0.19-0.34],  $t_0 = -0.62 \text{ y}$  [-0.95-(-0.36)]; random-effect vBGF:  $L_{\infty} = 291.98$  mm [262.36-321.59],  $k = 1.27 \text{ y}^{-1}$  [1.18-1.36],  $t_0 = -0.48 \text{ y}$  [-0.57-(-0.41)]).
